# Supplementary material
Source: Springer Nature journal article supplement (https://www.springermedizin.de/resource/supplementary/13046_2010_323_MOESM1_ESM.pdf/9662118)

**The inhibition of proliferation(%)**

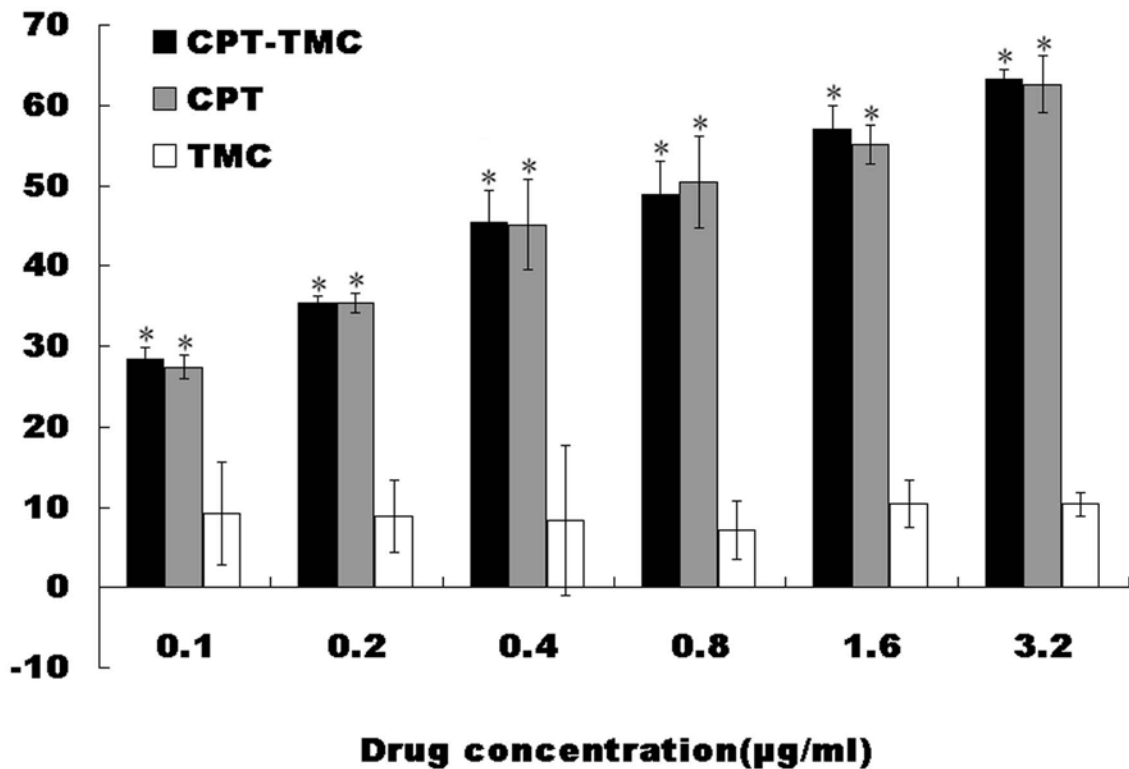

Supplement: MOESM1 [file 9662118]
